# Supplementary material
Source: Springer Nature journal article supplement (https://www.springermedizin.de/resource/supplementary/12891_2014_2196_MOESM3_ESM.pdf/9509598)
Supplement: MOESM3 [file 9509598]

|          | <b>Intervention</b>                                                                                                 | <b>Comparator (control)</b>    |
|----------|---------------------------------------------------------------------------------------------------------------------|--------------------------------|
| <b>A</b> | Local anaesthetic infiltration                                                                                      | No wound infiltration/ placebo |
| <b>B</b> | Local anaesthetic infiltration<br>Additional post-closure analgesia delivered through a catheter or as an injection | No wound infiltration/ placebo |
| <b>C</b> | Local anaesthetic infiltration                                                                                      | Femoral nerve block            |
| <b>D</b> | Local anaesthetic infiltration<br>Additional post-closure analgesia delivered through a catheter or as an injection | Femoral nerve block            |
| <b>E</b> | Local anaesthetic infiltration<br>Femoral nerve block                                                               | Femoral nerve block            |
| <b>F</b> | Local anaesthetic infiltration                                                                                      | Epidural/ other                |
